# Supplementary material for: GNSS time series and velocities about a slow convergent margin processed on HPC clusters: products and robustness evaluation
Source: Copernicus journal article supplement (doi:10.5194/essd-2023-131), 2023-06-09
Supplement: Supplementary file [file essd-2023-131-AC1-supplement.pdf]

# New upload

**Instructions:** (i) Upload minimum one file and fill-in required fields (marked with a red star). (ii) Press "Save" to save your upload for editing later. (iii) When ready, press "Publish" to finalize and make your upload public.

| Files <span>▼</span>                                                               |          |          |        |
|------------------------------------------------------------------------------------|----------|----------|--------|
| Filename (11 files)                                                                | Size     | Progress | Delete |
| Tables.tgz<br>md5:0917f09a55031f26ff82486983e941d <span>?</span>                   | 624 kB   | ✓        |        |
| TimeSeries_ETRF14_plots.tgz<br>md5:bfc644e983da5b46fc126843860ad593 <span>?</span> | 105.3 MB | ✓        |        |
| TimeSeries_ETRF14_pos.tgz<br>md5:dd2d1f58e76031fee5d2122f7cab3a1e2 <span>?</span>  | 80.2 MB  | ✓        |        |
| TimeSeries_ETRF14_res.tgz<br>md5:2c1e07cd11e0f71cfa09e52f5d3b2939 <span>?</span>   | 33.8 MB  | ✓        |        |
| TimeSeries_ETRF14_sinex.tgz<br>md5:1c978284517b4ee709782354b4ffcde <span>?</span>  | 12.8 GB  | ✓        |        |
| TimeSeries_ITRF14_plots.tgz<br>md5:fef95bad8c958c9279e1351318790bb2 <span>?</span> | 104.1 MB | ✓        |        |
| TimeSeries_ITRF14_pos.tgz<br>md5:4f4f30d0b37c88bb097c8e246f52e3c1 <span>?</span>   | 82.1 MB  | ✓        |        |
| TimeSeries_ITRF14_res.tgz<br>md5:8cd64db80d8b8193f6684e8fae08e2b0 <span>?</span>   | 34.9 MB  | ✓        |        |
| TimeSeries_ITRF14_sinex.tgz<br>md5:4a83d6af9dd593d78de5aad67d4d058 <span>?</span>  | 12.8 GB  | ✓        |        |
| TimeSeries_...                                                                     | 12.8 GB  | ✓        |        |

Choose files

Start upload
